# Supplementary material for: Differences in the Volatilomic Urinary Biosignature of Prostate Cancer Patients as a Feasibility Study for the Detection of Potential Biomarkers
Source: MDPI journal article supplement (doi:10.3390/curroncol30050370), 2023-05-10
Supplement: s1 [file s1]

**Table S1.** Identified metabolites in urine samples of PCa patients and healthy subjects. Retention time (RT) in min, formula, CAS number and chemical family is reported for each compound. Frequency of occurrence as a percentage (%) and mean relative peak areas are reported for prostate cancer and control groups ( $n = 3$ ; RSD < 20 %).

| RT (min) | VOM                                                  | Formula                                       | CAS No.    | Chemical family | Frequency of occurrence (%) |      | Mean relative peak area |       |
|----------|------------------------------------------------------|-----------------------------------------------|------------|-----------------|-----------------------------|------|-------------------------|-------|
|          |                                                      |                                               |            |                 | PCa                         | CTRL | PCa                     | CTRL  |
| 20.13    | 6-Methylphenanthridine                               | C <sub>14</sub> H <sub>11</sub> N             | 3955-65-5  | HHc             | 81                          | 100  | 4.38                    | 10.50 |
| 20.77    | 2-Pentanone                                          | C <sub>5</sub> H <sub>10</sub> O              | 107-87-9   | Ket             | 54                          | 57   | 3.65                    | 5.70  |
| 22.30    | 3-Nonyne                                             | C <sub>9</sub> H <sub>16</sub>                | 20184-89-8 | Hc              | 4                           | 3    | 0.24                    | 0.09  |
| 22.93    | 1-Methylcycloheptene                                 | C <sub>8</sub> H <sub>14</sub>                | 55308-20-8 | Hc              | 19                          | 10   | 1.22                    | 0.92  |
| 23.37    | (+)-Linalool                                         | C <sub>10</sub> H <sub>18</sub>               | 10281-56-8 | Ter             | 4                           | 0    | 0.26                    | -     |
| 23.61    | 1,3-Dimethyl-1-cyclohexene                           | C <sub>8</sub> H <sub>14</sub>                | 2808-76-6  | Hc              | 50                          | 37   | 3.09                    | 3.04  |
| 23.90    | 1-Decene                                             | C <sub>10</sub> H <sub>20</sub>               | 872-05-9   | Hc              | 4                           | 0    | 0.17                    | -     |
| 24.41    | 3-Hexanone                                           | C <sub>6</sub> H <sub>12</sub> O              | 589-38-8   | Ket             | 19                          | 13   | 0.66                    | 0.39  |
| 25.23    | <i>p</i> -Menth-3-ene                                | C <sub>10</sub> H <sub>18</sub>               | 500-00-5   | Ter             | 4                           | 7    | 0.80                    | 0.30  |
| 26.14    | Dimethyl disulfide                                   | C <sub>2</sub> H <sub>6</sub> S <sub>2</sub>  | 624-92-0   | SC              | 100                         | 100  | 20.01                   | 20.88 |
| 26.39    | Hexanal                                              | C <sub>6</sub> H <sub>12</sub> O              | 66-25-1    | Ald             | 19                          | 20   | 1.92                    | 1.36  |
| 28.64    | 4-Heptanone                                          | C <sub>7</sub> H <sub>14</sub> O              | 123-19-3   | Ket             | 100                         | 100  | 30.76                   | 37.48 |
| 29.85    | <i>o</i> -Xylene                                     | C <sub>8</sub> H <sub>10</sub>                | 95-47-6    | BD              | 4                           | 3    | 0.14                    | 0.10  |
| 31.89    | 1,4-Cineol                                           | C <sub>10</sub> H <sub>18</sub> O             | 470-67-7   | Ter             | 4                           | 13   | 0.24                    | 0.57  |
| 31.96    | 2-Carene                                             | C <sub>10</sub> H <sub>16</sub>               | 554-61-0   | Ter             | 4                           | 20   | 0.15                    | 2.23  |
| 32.06    | $\alpha$ -Terpinene                                  | C <sub>10</sub> H <sub>16</sub>               | 99-86-5    | Ter             | 19                          | 23   | 1.23                    | 2.00  |
| 32.58    | 2-Heptanone                                          | C <sub>7</sub> H <sub>14</sub> O              | 110-43-0   | Ket             | 4                           | 0    | 0.14                    | -     |
| 33.86    | 4-Methyl-2-heptanone                                 | C <sub>8</sub> H <sub>16</sub> O              | 6137-06-0  | Ket             | 8                           | 0    | 0.15                    | -     |
| 33.99    | Eucalyptol                                           | C <sub>10</sub> H <sub>18</sub> O             | 470-82-6   | Ter             | 4                           | 10   | 0.10                    | 1.09  |
| 34.70    | 1-Pentylcyclohexene                                  | C <sub>11</sub> H <sub>20</sub>               | 15232-85-6 | Hc              | 0                           | 7    | -                       | 0.84  |
| 35.68    | 2,2-dimethyl-5-(1-methyl-1-propenyl)-tetrahydrofuran | C <sub>10</sub> H <sub>18</sub> O             | 7416-35-5  | FC              | 96                          | 83   | 10.01                   | 11.90 |
| 36.18    | $\gamma$ -Terpinene                                  | C <sub>10</sub> H <sub>16</sub>               | 99-85-4    | Ter             | 15                          | 20   | 0.36                    | 1.32  |
| 37.04    | 3,5-Dihydroxybenzamide                               | C <sub>7</sub> H <sub>7</sub> NO <sub>3</sub> | 3147-62-4  | BD              | 15                          | 3    | 1.27                    | 0.08  |
| 37.09    | 3,4-Dimethylthiophene                                | C <sub>6</sub> H <sub>8</sub> S               | 632-15-5   | SC              | 4                           | 10   | 0.08                    | 0.42  |

|       |                                               |                                                |             |     |    |    |       |       |
|-------|-----------------------------------------------|------------------------------------------------|-------------|-----|----|----|-------|-------|
| 37.59 | <i>p</i> -Cymene                              | C <sub>10</sub> H <sub>14</sub>                | 99-87-6     | Ter | 81 | 33 | 12.52 | 14.86 |
| 37.85 | <i>o</i> -Cymene                              | C <sub>10</sub> H <sub>14</sub>                | 527-84-4    | Ter | 58 | 67 | 4.91  | 25.73 |
| 38.54 | $\alpha$ -Terpinene                           | C <sub>10</sub> H <sub>16</sub>                | 99-86-5     | Ter | 15 | 7  | 1.97  | 0.74  |
| 38.62 | <i>m</i> -Cymene                              | C <sub>10</sub> H <sub>14</sub>                | 535-77-3    | Ter | 4  | 3  | 0.06  | 0.06  |
| 38.79 | Allyl methyl disulfide                        | C <sub>4</sub> H <sub>8</sub> S <sub>2</sub>   | 2179-58-0   | SC  | 8  | 17 | 0.86  | 1.32  |
| 39.05 | Isoterpinolene                                | C <sub>10</sub> H <sub>16</sub>                | 586-63-0    | Ter | 35 | 3  | 1.37  | 0.69  |
| 40.13 | 1,4,6-Trimethylnaphthalene                    | C <sub>13</sub> H <sub>14</sub>                | 2131-42-2   | Nor | 8  | 0  | 0.85  | -     |
| 40.41 | 1,6,7-Trimethylnaphthalene                    | C <sub>13</sub> H <sub>14</sub>                | 2245-38-7   | Nor | 4  | 10 | 0.32  | 0.55  |
| 40.88 | 2,6-Dimethyl-1,6-octadiene                    | C <sub>10</sub> H <sub>18</sub>                | 80-49-35    | Hc  | 4  | 0  | 0.28  | -     |
| 40.97 | 1,3-Cycloheptadiene                           | C <sub>7</sub> H <sub>10</sub>                 | 4054-38-0   | Hc  | 12 | 3  | 0.87  | 0.12  |
| 40.97 | 2,3,6-Trimethylnaphthalene                    | C <sub>13</sub> H <sub>14</sub>                | 829-26-5    | Nor | 4  | 0  | 0.23  | -     |
| 40.98 | 2,2,6-Trimethylcyclohexanone                  | C <sub>9</sub> H <sub>16</sub> O               | 2408-37-9   | Ket | 4  | 10 | 0.14  | 0.28  |
| 41.97 | Hemimellitene                                 | C <sub>9</sub> H <sub>12</sub>                 | 526-73-8    | BD  | 15 | 3  | 0.95  | 0.26  |
| 42.10 | <i>p</i> -Ethyltoluene                        | C <sub>9</sub> H <sub>12</sub>                 | 622-96-8    | BD  | 8  | 20 | 0.85  | 2.10  |
| 43.15 | <i>p</i> -Methylstyrene                       | C <sub>9</sub> H <sub>10</sub>                 | 622-97-9    | BD  | 4  | 7  | 0.05  | 0.23  |
| 44.37 | 2-Methoxy-5-methylthiophene                   | C <sub>6</sub> H <sub>8</sub> OS               | 31053-55-1  | SC  | 46 | 13 | 4.29  | 1.13  |
| 44.47 | 2-Methyl-5-(methylthio)furan                  | C <sub>6</sub> H <sub>8</sub> OS               | 13678-59-6  | FC  | 42 | 73 | 5.32  | 6.12  |
| 44.58 | Nonanal                                       | C <sub>9</sub> H <sub>18</sub> O               | 124-19-6    | Ald | 12 | 0  | 1.73  | -     |
| 44.95 | Dimethyl trisulfide                           | C <sub>2</sub> H <sub>6</sub> S <sub>3</sub>   | 3658-80-8   | SC  | 46 | 17 | 2.79  | 1.23  |
| 45.19 | 2-Carene                                      | C <sub>10</sub> H <sub>16</sub>                | 554-61-0    | Ter | 0  | 3  | -     | 0.12  |
| 45.21 | Allo-Ocimene                                  | C <sub>10</sub> H <sub>16</sub>                | 673-84-7    | Ter | 0  | 7  | -     | 0.28  |
| 46.09 | Tetrahydrideinalool                           | C <sub>10</sub> H <sub>22</sub> O              | 57706-88-4  | Ter | 19 | 20 | 1.90  | 3.84  |
| 46.36 | <i>m</i> -Di-tert-butylbenzene                | C <sub>14</sub> H <sub>22</sub>                | 1014-60-4   | BD  | 0  | 3  | -     | 0.27  |
| 46.88 | 1,5,7-trimethyl-1,2,3,4-tetrahydronaphthalene | C <sub>13</sub> H <sub>18</sub>                | 21693-55-0  | Nor | 0  | 3  | -     | 0.37  |
| 47.33 | <i>p</i> -Cymenene                            | C <sub>10</sub> H <sub>12</sub>                | 1195-32-0   | Ter | 96 | 97 | 19.08 | 39.30 |
| 47.64 | <i>o</i> -Cymenene                            | C <sub>10</sub> H <sub>12</sub>                | 7399-49-7   | Ter | 0  | 10 | -     | 0.66  |
| 47.69 | 3-Methyl-2-butenic acid, tridec-2-ynyl ester  | C <sub>18</sub> H <sub>30</sub> O <sub>2</sub> | 100029-93-1 | Est | 4  | 0  | 0.53  | 0.00  |
| 48.04 | Dihydromyrcenol                               | C <sub>10</sub> H <sub>20</sub> O              | 18479-58-8  | Ter | 96 | 83 | 17.57 | 11.58 |
| 48.11 | $\alpha$ -Ionene                              | C <sub>13</sub> H <sub>18</sub>                | 30316-36-0  | Nor | 0  | 7  | -     | 1.11  |

|       |                                              |                                                |             |     |     |     |       |       |
|-------|----------------------------------------------|------------------------------------------------|-------------|-----|-----|-----|-------|-------|
| 48.95 | <i>t</i> -Furan linalool oxide               | C <sub>10</sub> H <sub>18</sub> O <sub>2</sub> | 34995-77-2  | FC  | 46  | 57  | 2.31  | 6.72  |
| 49.05 | Nerol oxide                                  | C <sub>10</sub> H <sub>16</sub> O              | 1786-08-9   | Ter | 4   | 0   | 0.78  | -     |
| 49.23 | 2-Ethyl-1-hexanol                            | C <sub>8</sub> H <sub>18</sub> O               | 104-76-7    | Alc | 100 | 100 | 9.19  | 8.92  |
| 49.42 | 2-Mercapto-4-phenylthiazole                  | C <sub>9</sub> H <sub>7</sub> NS <sub>2</sub>  | 2103-88-0   | HHc | 12  | 0   | 1.65  | 0.00  |
| 50.52 | Prehnitene                                   | C <sub>10</sub> H <sub>14</sub>                | 488-23-3    | Ter | 58  | 50  | 5.29  | 4.83  |
| 51.04 | Theaspirane                                  | C <sub>13</sub> H <sub>22</sub> O              | 36431-72-8  | Nor | 69  | 67  | 3.99  | 6.30  |
| 51.57 | Carvestrene                                  | C <sub>10</sub> H <sub>16</sub>                | 499-03-6    | Ter | 4   | 0   | 0.20  | -     |
| 52.25 | 2,5-Diisopropyl-p-xylene                     | C <sub>14</sub> H <sub>22</sub>                | 10375-96-9  | BD  | 0   | 13  | -     | 0.98  |
| 52.46 | β-Ionone                                     | C <sub>13</sub> H <sub>20</sub> O              | 6901-97-9   | Nor | 85  | 83  | 22.00 | 28.77 |
| 52.92 | Theaspirane                                  | C <sub>13</sub> H <sub>22</sub> O              | 100019-43-4 | No  | 65  | 80  | 3.85  | 7.31  |
| 53.18 | 2-(Methylthio)thiophene                      | C <sub>5</sub> H <sub>6</sub> S <sub>2</sub>   | 5780-36-9   | SC  | 8   | 0   | 0.26  | -     |
| 53.43 | Cadalene                                     | C <sub>15</sub> H <sub>18</sub>                | 483-78-3    | Ses | 8   | 10  | 0.17  | 0.80  |
| 54.10 | α-Ionene                                     | C <sub>13</sub> H <sub>18</sub>                | 475-03-6    | Nor | 12  | 27  | 0.93  | 1.15  |
| 54.70 | 5-Methylfurfural                             | C <sub>6</sub> H <sub>6</sub> O <sub>2</sub>   | 620-02-0    | FC  | 42  | 40  | 4.56  | 3.83  |
| 54.70 | 2-Fenchanol                                  | C <sub>10</sub> H <sub>18</sub> O              | 1632-73-1   | Ter | 8   | 0   | 0.20  | -     |
| 54.84 | 1-Methylene-spiro[4.4]nonane                 | C <sub>10</sub> H <sub>16</sub>                | 19144-06-0  | Hc  | 0   | 10  | -     | 0.55  |
| 55.20 | (±)-Neoisomenthol                            | C <sub>10</sub> H <sub>20</sub> O              | 491-02-1    | Ter | 54  | 57  | 5.66  | 4.66  |
| 55.79 | Terpinene-4-ol                               | C <sub>10</sub> H <sub>18</sub> O              | 000562-74-3 | Ter | 8   | 7   | 0.14  | 1.12  |
| 55.98 | 2-Methyl-benzofuran                          | C <sub>9</sub> H <sub>8</sub> O                | 4265-25-2   | FC  | 4   | 10  | 0.09  | 0.39  |
| 56.69 | 2-Ethyl-1-butene                             | C <sub>6</sub> H <sub>6</sub> O <sub>2</sub>   | 620-02-0    | Hc  | 12  | 13  | 1.96  | 0.69  |
| 57.26 | Menthol                                      | C <sub>10</sub> H <sub>20</sub> O              | 15356-70-4  | Ter | 85  | 97  | 19.86 | 25.17 |
| 57.86 | Myrtenal                                     | C <sub>10</sub> H <sub>14</sub> O              | 564-94-3    | Ter | 8   | 7   | 0.30  | 0.21  |
| 58.29 | 6-Methyl-3(2H)-pyridazinone                  | C <sub>5</sub> H <sub>6</sub> N <sub>2</sub> O | 13327-27-0  | HHc | 4   | 10  | 0.26  | 0.33  |
| 58.66 | 1,1,4,7-Tetramethylindan                     | C <sub>13</sub> H <sub>18</sub>                | 1078-04-2   | Hc  | 35  | 43  | 3.34  | 3.57  |
| 58.76 | α-Ionene                                     | C <sub>13</sub> H <sub>18</sub>                | 475-03-6    | Nor | 8   | 10  | 0.83  | 0.62  |
| 59.66 | Durene                                       | C <sub>10</sub> H <sub>14</sub>                | 95-93-2     | Ter | 4   | 17  | 0.21  | 1.46  |
| 59.86 | γ-Vinyl-γ-valerolactone                      | C <sub>7</sub> H <sub>10</sub> O <sub>2</sub>  | 1073-11-6   | FC  | 27  | 33  | 1.91  | 2.80  |
| 59.87 | 2,3,5,5,8,8-Hexamethyl-1,3,6-cyclooctatriene | C <sub>14</sub> H <sub>22</sub>                | 100016-19-7 | Hc  | 0   | 0   | -     | -     |
| 59.87 | 2,5-Diisopropyl-p-xylene                     | C <sub>14</sub> H <sub>22</sub>                | 10375-96-9  | BD  | 0   | 7   | -     | 0.33  |

|       |                                                |                                                 |             |     |    |     |       |       |
|-------|------------------------------------------------|-------------------------------------------------|-------------|-----|----|-----|-------|-------|
| 60.18 | p-Menth-1(7)-en-2-one                          | C <sub>10</sub> H <sub>16</sub> O               | 15297-07-1  | Ter | 15 | 33  | 2.20  | 3.15  |
| 60.60 | $\alpha$ -Cyclogeraniol                        | C <sub>10</sub> H <sub>18</sub> O               | 6627-74-3   | Ter | 4  | 0   | 0.22  | -     |
| 61.06 | 1,5,8-Trimethyl-1,2,3,4-tetrahydronaphthalene  | C <sub>13</sub> H <sub>18</sub>                 | 21693-51-6  | Nor | 4  | 13  | 0.96  | 1.05  |
| 61.37 | $\alpha$ -Methyl-cinnamaldehyde                | C <sub>10</sub> H <sub>14</sub> O               | 585-34-2    | Ald | 8  | 53  | 0.40  | 5.53  |
| 61.42 | 4,7-Dimethylbenzofuran                         | C <sub>10</sub> H <sub>10</sub> O               | 28715-26-6  | FC  | 27 | 43  | 1.45  | 6.14  |
| 61.49 | 1,1,6-Trimethyl-1,2,3,4-tetrahydronaphthalene  | C <sub>13</sub> H <sub>18</sub>                 | 30316-36-0  | Nor | 12 | 7   | 0.71  | 0.81  |
| 61.70 | <i>m</i> -tert-Butylphenol                     | C <sub>10</sub> H <sub>14</sub> O               | 585-34-2    | PC  | 19 | 7   | 1.74  | 1.72  |
| 62.28 | 6-tert-Butyltetralin                           | C <sub>14</sub> H <sub>20</sub>                 | 42044-26-8  | ND  | 15 | 0   | 1.03  | -     |
| 62.31 | Phellandral                                    | C <sub>10</sub> H <sub>16</sub> O               | 21391-98-0  | Ter | 4  | 17  | 0.14  | 1.98  |
| 62.32 | 3,3,5,7-Tetramethyl-1-indanone                 | C <sub>13</sub> H <sub>16</sub> O               | 54789-23-0  | Ket | 23 | 17  | 1.71  | 1.59  |
| 62.47 | Piperitone                                     | C <sub>10</sub> H <sub>16</sub> O               | 89-81-6     | Ter | 31 | 37  | 4.08  | 5.01  |
| 62.55 | 2-Caranone                                     | C <sub>10</sub> H <sub>16</sub> O               | 497-62-1    | Ter | 4  | 3   | 0.98  | 0.38  |
| 62.68 | <i>p</i> -tert-Butylphenol                     | C <sub>10</sub> H <sub>14</sub> O               | 585-34-2    | PC  | 46 | 67  | 4.03  | 12.79 |
| 63.00 | 1,2,3,4-tetramethyl-4-(1-methylethenyl)benzene | C <sub>13</sub> H <sub>18</sub>                 | 61142-76-5  | BD  | 12 | 17  | 0.96  | 1.63  |
| 63.23 | D-Carvone                                      | C <sub>10</sub> H <sub>14</sub> O               | 2244-16-8   | Ter | 62 | 100 | 19.90 | 48.01 |
| 63.79 | 1,1,6-Trimethyl-1,2-dihydronaphthalene         | C <sub>13</sub> H <sub>16</sub>                 | 30364-38-6  | Nor | 65 | 7   | 28.58 | 0.43  |
| 64.47 | 3-Methoxy-5-(trifluoromethyl)aniline           | C <sub>8</sub> H <sub>8</sub> F <sub>3</sub> NO | 349-55-3    | BD  | 81 | 93  | 11.61 | 17.15 |
| 64.62 | <i>p</i> -Acetyltoluene                        | C <sub>9</sub> H <sub>10</sub> O                | 122-00-9    | Ket | 8  | 27  | 0.84  | 1.58  |
| 64.86 | Salicylic acid, methyl ester                   | C <sub>8</sub> H <sub>8</sub> O <sub>3</sub>    | 119-36-8    | Est | 38 | 40  | 5.82  | 5.63  |
| 64.92 | 2-Methyl-3-phenylpropanal                      | C <sub>10</sub> H <sub>12</sub> O               | 100013-18-7 | Ald | 8  | 20  | 0.28  | 4.26  |
| 65.12 | 1-(2,3,6-Trimethylphenyl)-3-buten-2-one        | C <sub>13</sub> H <sub>16</sub> O               | 54789-45-6  | Nor | 8  | 10  | 1.15  | 1.63  |
| 65.26 | 1,4-Dimethoxy-2,3-dimethylbenzene              | C <sub>10</sub> H <sub>14</sub> O <sub>2</sub>  | 39021-83-5  | BD  | 15 | 3   | 1.47  | 0.27  |
| 65.83 | 1-(3-Methylbutyl)-2,3,5-trimethylbenzene       | C <sub>14</sub> H <sub>22</sub>                 | 107997-60-4 | BD  | 8  | 13  | 1.06  | 0.88  |
| 66.22 | $\beta$ -Damascenone                           | C <sub>13</sub> H <sub>18</sub> O               | 23726-93-4  | Nor | 77 | 63  | 7.52  | 10.64 |
| 66.48 | 3,5-Dimethyl benzaldehyde                      | C <sub>9</sub> H <sub>10</sub> O                | 5779-95-3   | Ald | 88 | 13  | 8.55  | 0.68  |
| 66.85 | 1,6,8-trimethyl-1,2,3,4-tetrahydronaphthalene- | C <sub>13</sub> H <sub>18</sub>                 | 30316-36-0  | Nor | 38 | 50  | 2.10  | 4.13  |
| 67.83 | 2-methoxyphenol                                | C <sub>7</sub> H <sub>8</sub> O <sub>2</sub>    | 90-05-1     | PC  | 77 | 90  | 5.89  | 7.91  |
| 68.41 | 1,1-dimethylethyl-4-benzenethiol               | C <sub>10</sub> H <sub>14</sub> S               | 2396-68-1   | SC  | 12 | 23  | 0.77  | 2.47  |
| 68.68 | 1,3,3a,4,5,9b-hexahydro-2H-Benz[e]indol-2-one  | C <sub>12</sub> H <sub>13</sub> NO              | 32940-67-3  | Ket | 4  | 0   | 0.90  | -     |

|       |                                                                                 |                                                              |             |     |     |     |       |       |
|-------|---------------------------------------------------------------------------------|--------------------------------------------------------------|-------------|-----|-----|-----|-------|-------|
| 69.05 | 1,2,3-Trimethylindene                                                           | C <sub>12</sub> H <sub>14</sub>                              | 4773-83-5   | Hc  | 8   | 40  | 0.24  | 2.93  |
| 69.36 | 2,3,6-trimethyl-4-methoxyphenol                                                 | C <sub>10</sub> H <sub>14</sub> O <sub>2</sub>               | 53651-61-9  | PC  | 31  | 3   | 2.43  | 0.18  |
| 69.84 | 1,1,6,8-Tetramethyl-1,2-dihydronaphthalene                                      | C <sub>14</sub> H <sub>18</sub>                              | 100018-66-3 | ND  | 12  | 27  | 0.30  | 3.01  |
| 70.67 | Acetate, (2,5,5,8a-tetramethyl-1,2,3,5,6,7,8,8a-octahydro-1-naphthalenyl) ester | C <sub>16</sub> H <sub>26</sub> O <sub>2</sub>               | 101447-86-3 | Est | 46  | 83  | 2.79  | 10.14 |
| 70.95 | Heptanoic acid                                                                  | C <sub>7</sub> H <sub>14</sub> O <sub>2</sub>                | 3665-80-3   | CA  | 19  | 43  | 0.87  | 4.42  |
| 71.27 | 5,6-Dimethyltetralin                                                            | C <sub>12</sub> H <sub>16</sub>                              | 20027-77-4  | ND  | 15  | 23  | 0.68  | 2.41  |
| 71.38 | N-Ethyl-4-nitroaniline                                                          | C <sub>8</sub> H <sub>10</sub> N <sub>2</sub> O <sub>2</sub> | 3665-80-3   | BD  | 42  | 57  | 2.86  | 4.60  |
| 71.90 | 2-Methoxy-p-cresol                                                              | C <sub>8</sub> H <sub>10</sub> O <sub>2</sub>                | 93-51-6     | PC  | 4   | 7   | 0.12  | 0.37  |
| 72.19 | [(tetramethylcyclopropylidene)methyl]benzene                                    | C <sub>14</sub> H <sub>18</sub>                              | 85036-38-0  | BD  | 15  | 7   | 1.18  | 0.30  |
| 72.51 | 2-Bromophenol                                                                   | C <sub>6</sub> H <sub>5</sub> BrO                            | 95-56-7     | PC  | 77  | 97  | 4.41  | 10.04 |
| 72.93 | 2,4-Dimethyl Quinoline                                                          | C <sub>11</sub> H <sub>11</sub> N                            | 1198-37-4   | HHc | 12  | 20  | 1.07  | 1.96  |
| 73.01 | 1,6-Dimethyl-4-(1-methylethyl)naphthalene                                       | C <sub>15</sub> H <sub>18</sub>                              | 483-78-3    | Ses | 0   | 10  | -     | 1.27  |
| 73.22 | 4-Methoxy-2,3,6-trimethylphenol                                                 | C <sub>10</sub> H <sub>14</sub> O <sub>2</sub>               | 53651-61-9  | PC  | 35  | 50  | 1.67  | 2.41  |
| 73.38 | 2',6'-Dihydroxy-3'-methylacetophenone                                           | C <sub>9</sub> H <sub>10</sub> O <sub>3</sub>                | 29183-78-6  | BD  | 31  | 10  | 1.61  | 0.71  |
| 73.64 | Phenol                                                                          | C <sub>6</sub> H <sub>6</sub> O                              | 108-95-2    | PC  | 100 | 97  | 22.30 | 20.32 |
| 74.11 | 3,5,8-trimethyl-1,2-dihydronaphthalene                                          | C <sub>13</sub> H <sub>16</sub>                              | 30316-18-8  | Nor | 0   | 10  | -     | 0.74  |
| 74.26 | 1,4-Dimethoxy-2,3-dimethylbenzene                                               | C <sub>10</sub> H <sub>14</sub> O <sub>2</sub>               | 39021-83-5  | HC  | 8   | 10  | 0.63  | 0.38  |
| 74.64 | 1,7-Dimethylnaphthalene                                                         | C <sub>12</sub> H <sub>12</sub>                              | 575-37-1    | ND  | 42  | 60  | 4.25  | 3.43  |
| 75.20 | Octanoic Acid                                                                   | C <sub>8</sub> H <sub>16</sub> O <sub>2</sub>                | 124-07-2    | CA  | 23  | 53  | 1.56  | 8.97  |
| 75.47 | 1-Methyl-2-phenylpiperidin-4-one                                                | C <sub>12</sub> H <sub>15</sub> NO                           | 91640-05-0  | Ket | 81  | 63  | 6.85  | 6.58  |
| 75.84 | Azunol                                                                          | C <sub>15</sub> H <sub>18</sub>                              | 489-84-9    | Ses | 0   | 27  | -     | 2.00  |
| 76.28 | 2,5,8-Trimethyl-1,4-dihydronaphthalene                                          | C <sub>13</sub> H <sub>16</sub>                              | 30316-19-9  | Nor | 38  | 43  | 4.29  | 6.41  |
| 76.62 | p-Cresol                                                                        | C <sub>7</sub> H <sub>8</sub> O                              | 106-44-5    | PC  | 100 | 100 | 71.61 | 55.20 |
| 77.14 | 1-Ethyl-3,5-dimethylbenzene                                                     | C <sub>10</sub> H <sub>14</sub>                              | 934-74-7    | Ter | 4   | 0   | 0.14  | -     |
| 77.45 | Cumic alcohol                                                                   | C <sub>10</sub> H <sub>14</sub> O                            | 536-60-7    | Ter | 0   | 10  | -     | 1.06  |
| 77.79 | Paeonal                                                                         | C <sub>9</sub> H <sub>10</sub> O <sub>3</sub>                | 552-41-0    | Ket | 27  | 10  | 1.99  | 0.66  |
| 78.06 | Eudalene                                                                        | C <sub>14</sub> H <sub>16</sub>                              | 490-65-3    | ND  | 15  | 47  | 1.42  | 3.25  |
| 78.74 | 3,3,5,6-Tetramethyl-1-indanone                                                  | C <sub>13</sub> H <sub>16</sub> O                            | 54789-22-9  | Ket | 81  | 87  | 8.68  | 8.18  |
| 79.48 | Nonanoic acid                                                                   | C <sub>9</sub> H <sub>18</sub> O <sub>2</sub>                | 112-05-0    | CA  | 50  | 47  | 4.57  | 4.24  |

|       |                                                 |                                                |            |     |    |    |      |      |
|-------|-------------------------------------------------|------------------------------------------------|------------|-----|----|----|------|------|
| 80.39 | 2,3,3-Trimethylindanone                         | C <sub>12</sub> H <sub>14</sub> O              | 54484-71-8 | Ket | 8  | 20 | 0.14 | 1.64 |
| 80.45 | Eugenol                                         | C <sub>10</sub> H <sub>12</sub> O <sub>2</sub> | 97-53-0    | PC  | 0  | 17 | -    | 1.38 |
| 80.47 | 4,5,5-trimethyl-1,3-cyclopentadien-1-yl-benzene | C <sub>14</sub> H <sub>16</sub>                | 33930-85-7 | BD  | 38 | 30 | 3.14 | 3.20 |
| 80.60 | $\alpha,\alpha,\alpha$ -Trifluoro-p-cresol      | C <sub>7</sub> H <sub>5</sub> F <sub>3</sub> O | 402-45-9   | PC  | 15 | 10 | 0.69 | 0.70 |

Legend: Alc: Alcohols; Ald: Aldehydes; BD: Benzene Derivatives; CA: Carboxylic Acid; CTRL: control; Est: Esters; FC: Furanic Compounds; Hc: Hydrocarbons; HHc, Heterocyclic Hydrocarbons; Ket: Ketones; ND: Naphthalene Detivatives; Nor: Norisoprenoids; PC: Phenolic Componds; PCa: prostate cancer; SC: Sulfur Compounds; Ses: Sesquiterpenes; Ter: Terpenes; “-”: not identified.
